# Supplementary material
Source: PubMed Central journal article supplement (PMC4302020)
Supplement: NIHMS642406-supplement-2.pdf [file NIHMS642406-supplement-2.pdf]

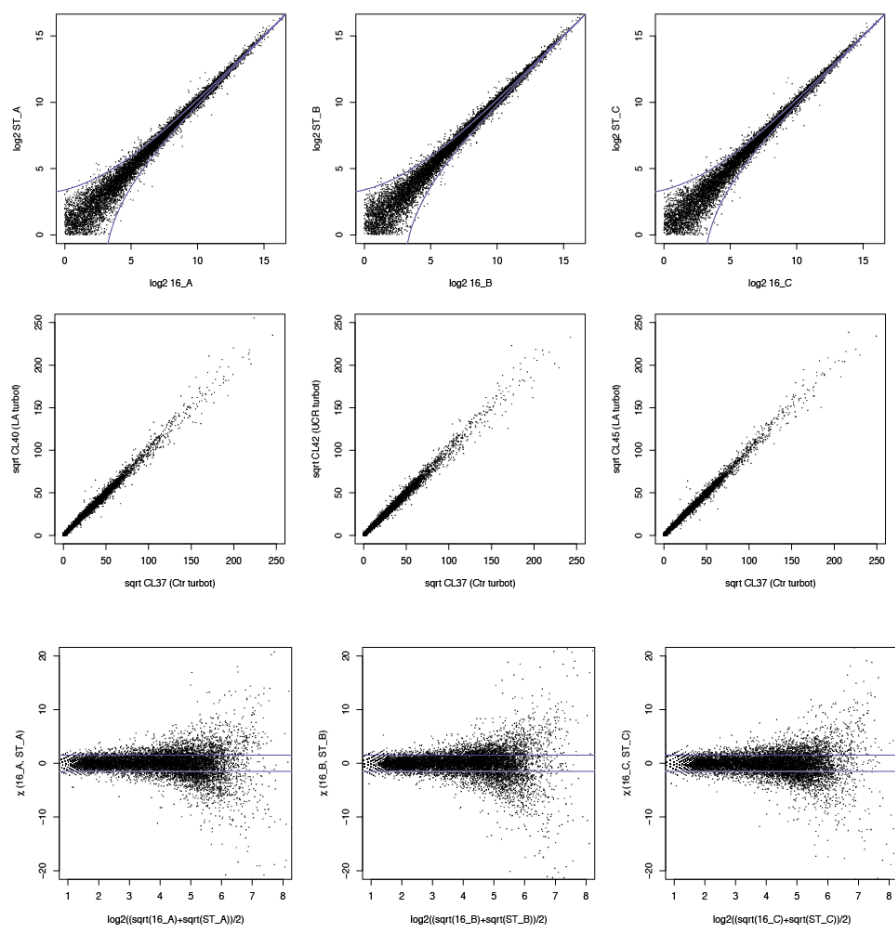

**Supplemental Figure 1. Scatter plots comparing the RNA-Seq data from stretched and static samples**  
 The blue lines denote 3 standard deviations of Poisson noise away from perfect identity. ST represents static samples. 16 denotes data from samples exposed to 16% cyclic stretch.

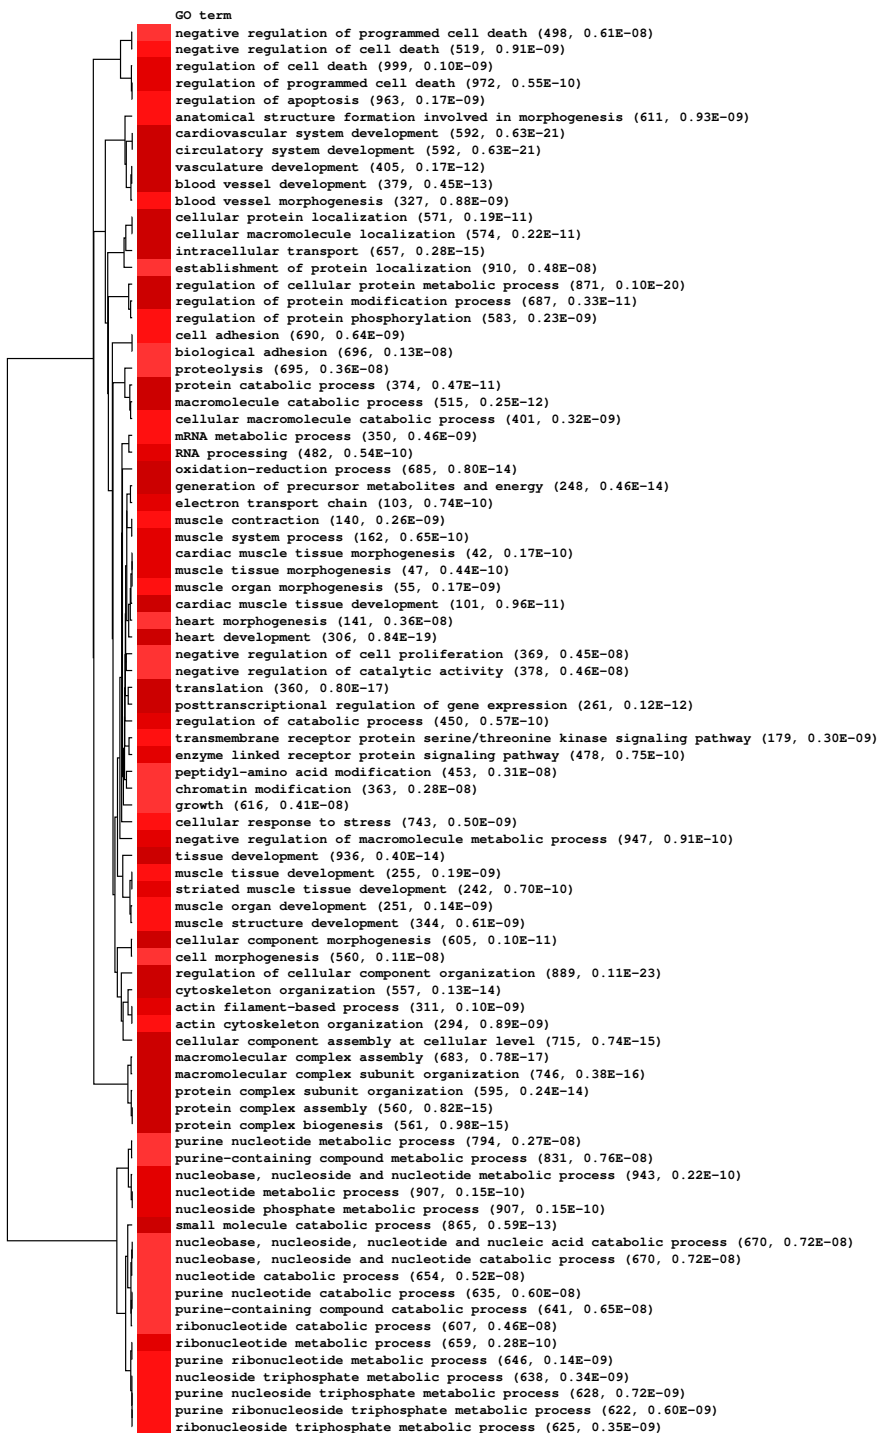

### Supplemental Figure 2. Information clustering of stretch-modulated biologic process GO-terms

Clustering of GO-terms associated with biologic processes is presented. Numbers in parentheses are number of expressed genes in the process and adjusted p-value. Hue of the red color is proportional to (log) p-value; darker color means higher significance.

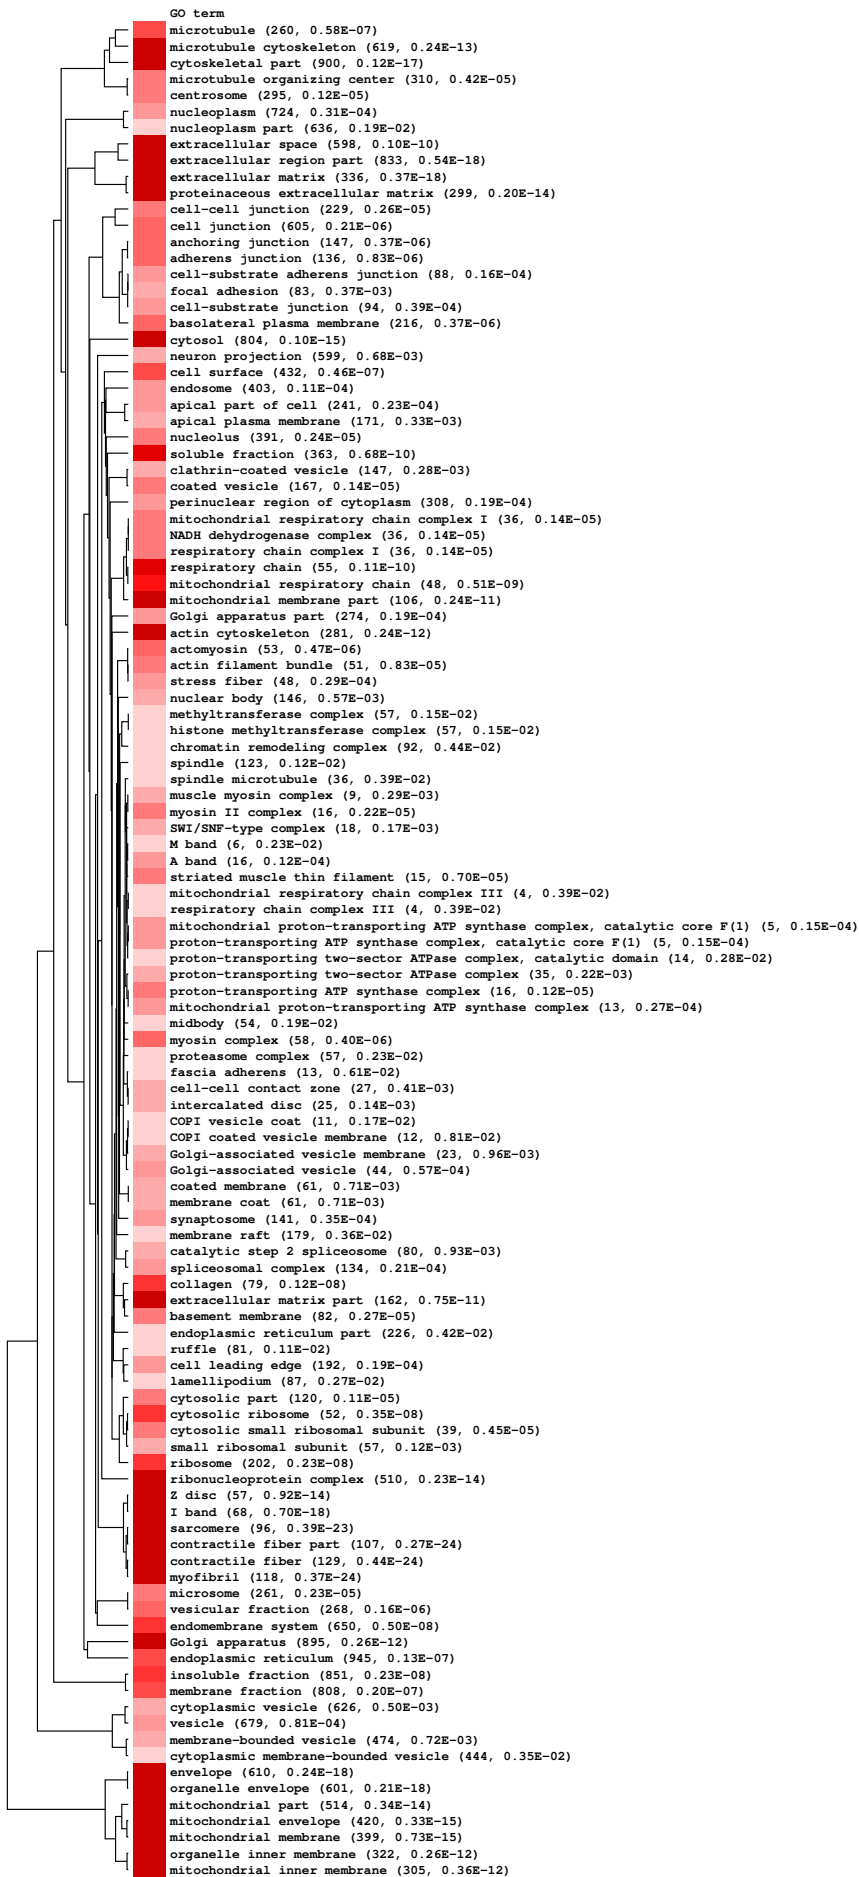

**Supplemental Figure 3. Information clustering of stretch-modulated cellular component GO-terms**

Clustering of GO-terms associated with cellular component is presented. Numbers in parentheses are number of expressed genes in the process and adjusted p-value. Hue of the red color is proportional to (log) p-value; darker color means higher significance.

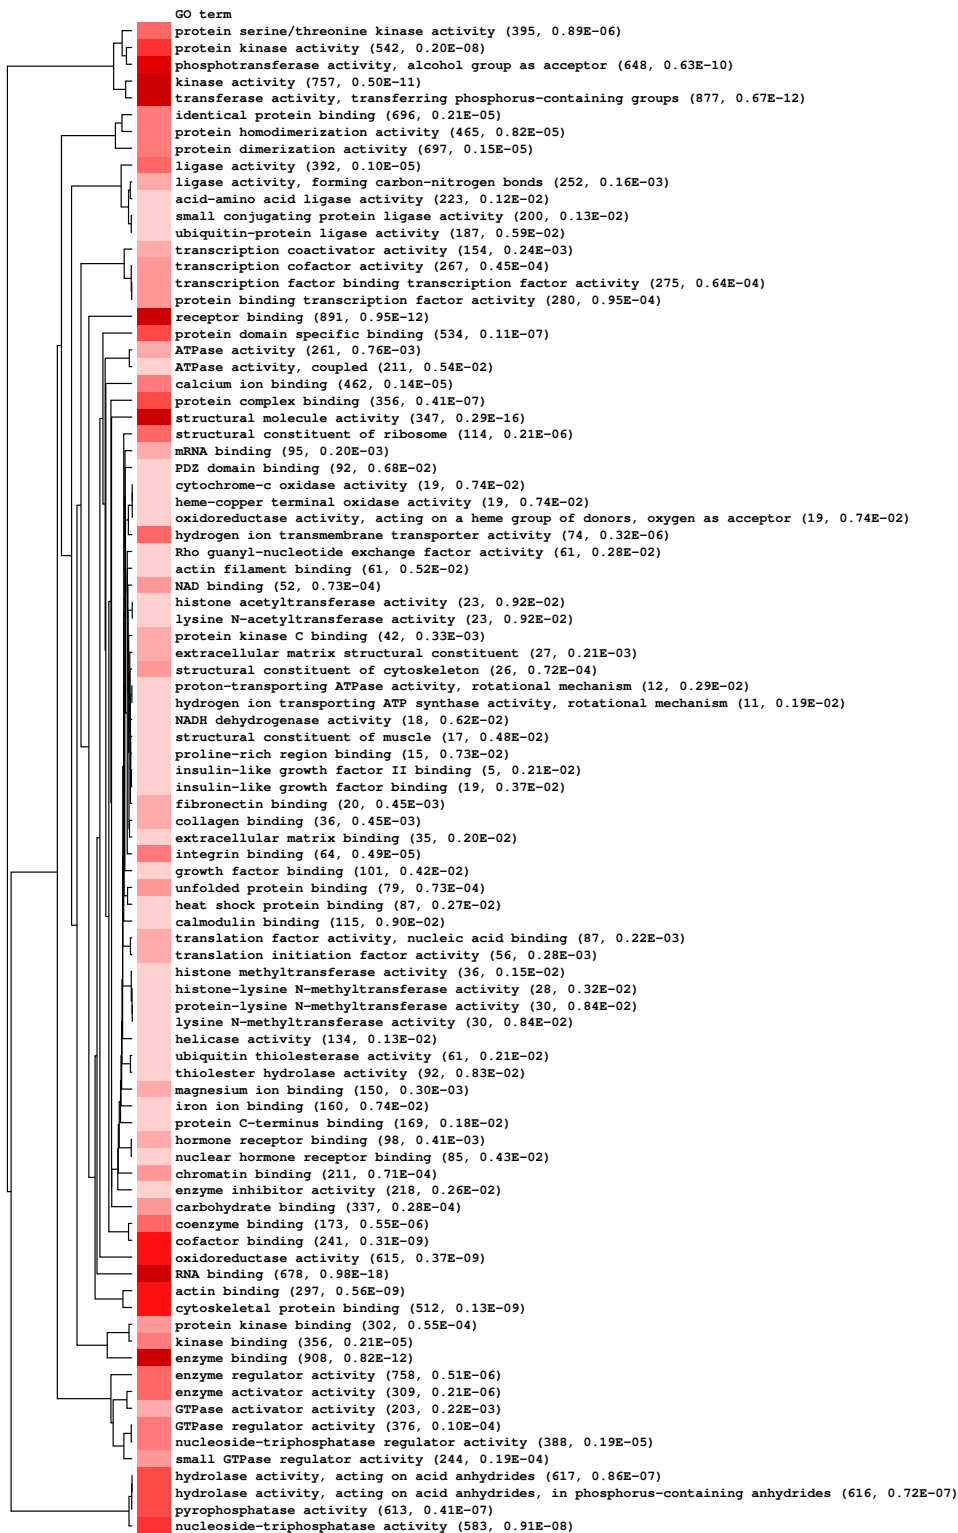

**Supplemental Figure 4. Information clustering of stretch-modulated molecular function GO-terms**  
 Clustering of GO-terms associated with Molecular Function is presented. Numbers in parentheses are number of expressed genes in the process and adjusted p-value. Hue of the red color is proportional to (log) p-value; darker color means higher significance.

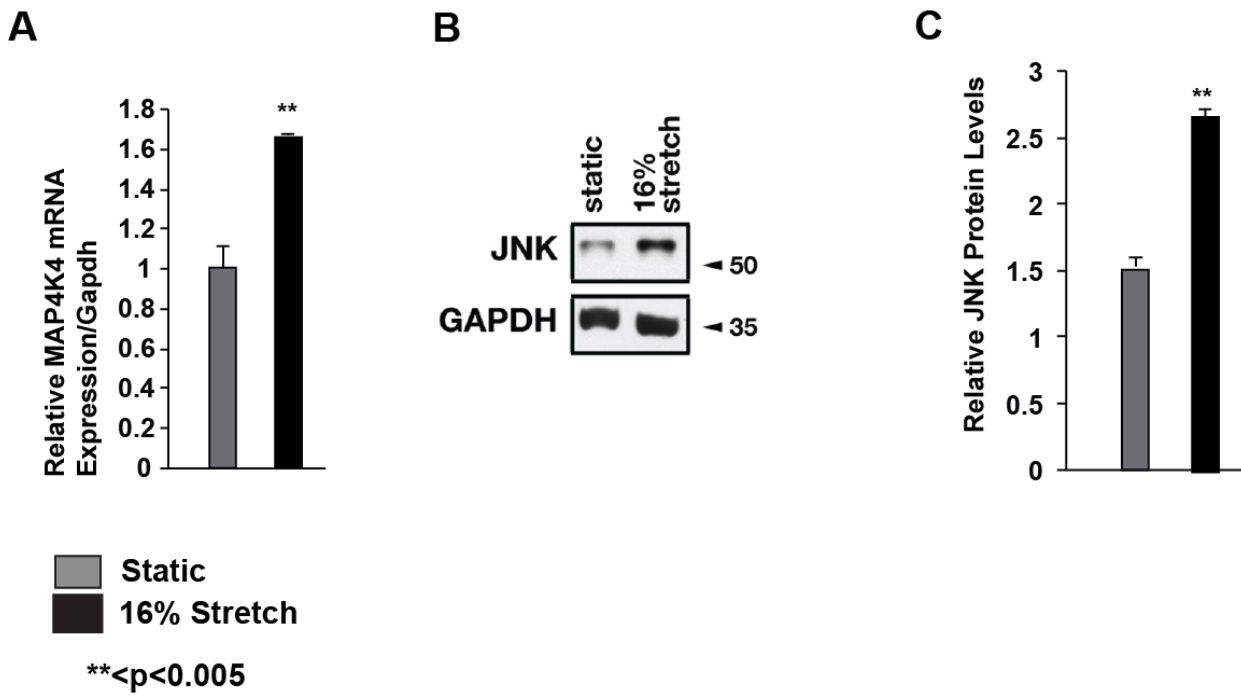

**Supplemental**

**Figure 5. Stretch increases of *MAP4K4* expression and JNK protein levels.** A. qPCR demonstrating that stretch is sufficient to increase the expression of *MAP4K4*, which is an activator of the JNK pathway (1 +/- 11.3% for static and 1.67 +/- 1.0%; n=4). B. and C. Cyclic stretch is sufficient to increase the protein levels of JNK. (1 +/- 14% for static and 2.66 +/- 12.4% for stretch; n=4).

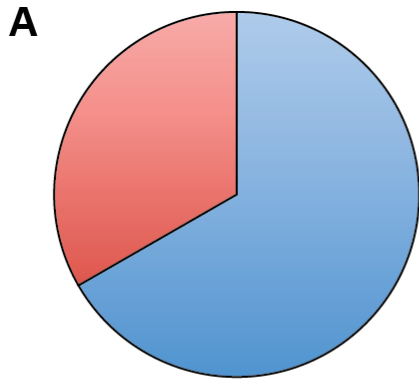

**Focal Adhesion**

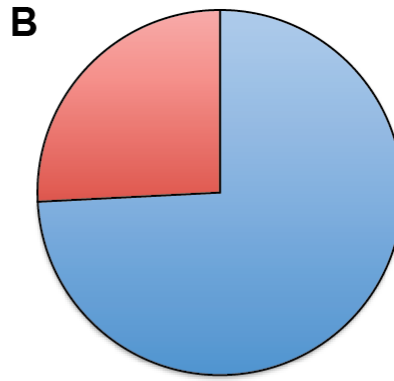

**Integrin binding**

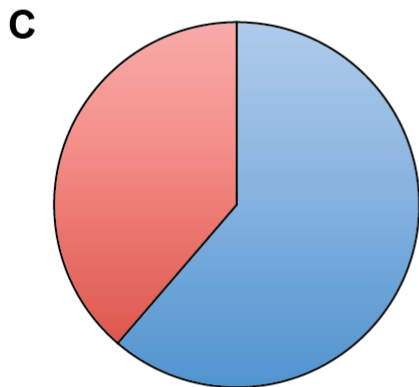

**Cytoskeletal**

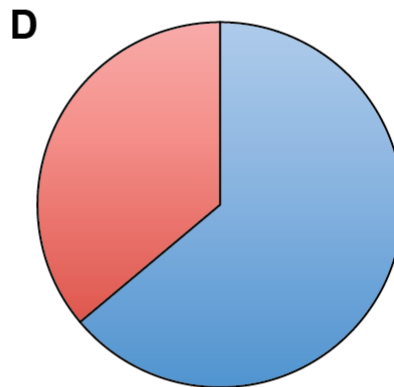

**Calcium Ion Binding**

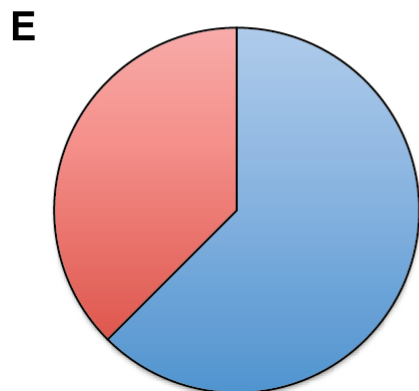

**Transcription**

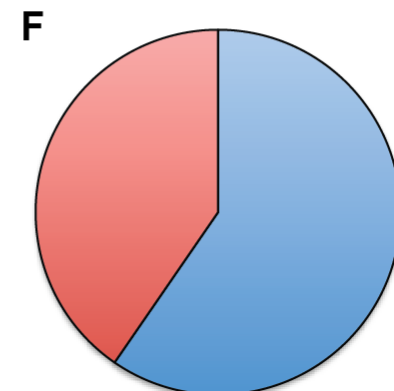

**Intracellular Kinase Cascade**

 **SMAD3 Target**

**Supplemental Figure 6. rVISTA analysis of selected stretch responsive GO-terms.** rVISTA analysis was performed for stretch responsive GO-terms (see section 3.1). Myofibrillar and cardiac development rVISTA results are in Fig 2F. A. 66.7% of stretch responsive genes in the focal adhesion GO are predicted to contain a conserved Smad3 site within 5 kb of the proximal promoter region ( $p < 0.05$ ). B. 74.2% of stretch responsive genes in the integrin binding GO-group have conserved Smad3 binding sites ( $p = 3.98 \times 10^{-6}$ ). C. 61.3% of cytoskeletal GO-members that are stretch responsive have conserved Smad3 binding sites ( $p = 9.77 \times 10^{-4}$ ). D. 63.9% of calcium binding genes that were stretch responsive have Smad3 binding sites ( $p = 3.98 \times 10^{-7}$ ). E. 62.5% of genes in the transcription GO-term are predicted to have Smad3 binding sites within the proximal

promoter region ( $p=1.62 \times 10^{-15}$ ). F. 59.6% of genes in the intracellular kinase cascade GO-term modulated by stretch contain a conserved Smad3 site ( $p=1.43 \times 10^{-10}$ ). Of note, GTPase, oxidoreductase activity, and translation GO-terms did not show significant SMAD3 enrichment using rVISTA.



**Supplemental Videos**

**Supplemental Video 1. Video demonstrating Dynamic Monolayer Force Microscopy (DMFM)**

**Supplemental Video 2. Video demonstrating DMFM in EMCs treated with Tgf- $\beta$ 2**

**Supplemental Video 3. Video demonstrating DMFM in control EMCs**

**Supplemental Data files**

**Supplemental File 1. Excel file of RNA-Seq data**

Table of the 4900 genes modulated by stretch with a FDR<0.05 are listed.

**Supplemental File 2. Excel file of Biologic Process GO-terms modulated by stretch**

**Supplemental File 3. Excel file of Cellular Components GO-terms modulated by stretch**

**Supplemental File 4. Excel file of Molecular Process GO-terms modulated by stretch**

## Biologic Process GO Terms Modulated by Stretch

| GO ID | Biological Process                                      | Bonferroni p-value |
|-------|---------------------------------------------------------|--------------------|
| 51128 | regulation of cellular component organization           | 1.08E-24           |
| 72358 | cardiovascular system development                       | 6.33E-22           |
| 72359 | circulatory system development                          | 6.33E-22           |
| 32268 | regulation of cellular protein metabolic process        | 1.03E-21           |
| 7507  | heart development                                       | 8.37E-20           |
| 65003 | macromolecular complex assembly                         | 7.75E-18           |
| 6412  | translation                                             | 7.97E-18           |
| 43933 | macromolecular complex subunit organization             | 3.83E-17           |
| 46907 | intracellular transport                                 | 2.82E-16           |
| 71844 | cellular component assembly at cellular level           | 7.36E-16           |
| 6461  | protein complex assembly                                | 8.18E-16           |
| 70271 | protein complex biogenesis                              | 9.85E-16           |
| 7010  | cytoskeleton organization                               | 1.31E-15           |
| 71822 | protein complex subunit organization                    | 2.44E-15           |
| 9888  | tissue development                                      | 3.97E-15           |
| 6091  | generation of precursor metabolites and energy          | 4.56E-15           |
| 55114 | oxidation-reduction process                             | 7.95E-15           |
| 1568  | blood vessel development                                | 4.47E-14           |
| 44282 | small molecule catabolic process                        | 5.93E-14           |
| 10608 | posttranscriptional regulation of gene expression       | 1.17E-13           |
| 1944  | vasculature development                                 | 1.66E-13           |
| 9057  | macromolecule catabolic process                         | 2.52E-13           |
| 32989 | cellular component morphogenesis                        | 1.04E-12           |
| 34613 | cellular protein localization                           | 1.94E-12           |
| 70727 | cellular macromolecule localization                     | 2.16E-12           |
| 31399 | regulation of protein modification process              | 3.31E-12           |
| 30163 | protein catabolic process                               | 4.65E-12           |
| 48738 | cardiac muscle tissue development                       | 9.57E-12           |
| 6753  | nucleoside phosphate metabolic process                  | 1.50E-11           |
| 9117  | nucleotide metabolic process                            | 1.50E-11           |
| 55008 | cardiac muscle tissue morphogenesis                     | 1.67E-11           |
| 55086 | nucleobase, nucleoside and nucleotide metabolic process | 2.23E-11           |
| 9259  | ribonucleotide metabolic process                        | 2.77E-11           |
| 60415 | muscle tissue morphogenesis                             | 4.44E-11           |
| 6396  | RNA processing                                          | 5.42E-11           |
| 43067 | regulation of programmed cell death                     | 5.45E-11           |
| 9894  | regulation of catabolic process                         | 5.68E-11           |
| 3012  | muscle system process                                   | 6.53E-11           |
| 14706 | striated muscle tissue development                      | 7.05E-11           |
| 22900 | electron transport chain                                | 7.39E-11           |
| 7167  | enzyme linked receptor protein signaling pathway        | 7.46E-11           |
| 10605 | negative regulation of macromolecule metabolic process  | 9.13E-11           |
| 10941 | regulation of cell death                                | 1.01E-10           |
| 30029 | actin filament-based process                            | 1.02E-10           |
| 7517  | muscle organ development                                | 1.42E-10           |
| 9150  | purine ribonucleotide metabolic process                 | 1.43E-10           |
| 48644 | muscle organ morphogenesis                              | 1.70E-10           |

|       |                                                          |          |
|-------|----------------------------------------------------------|----------|
| 42981 | regulation of apoptosis                                  | 1.75E-10 |
| 60537 | muscle tissue development                                | 1.91E-10 |
| 1932  | regulation of protein phosphorylation                    | 2.30E-10 |
| 6936  | muscle contraction                                       | 2.60E-10 |
| 7178  | transmembrane receptor protein serine/threonine kinas    | 3.04E-10 |
| 44265 | cellular macromolecule catabolic process                 | 3.23E-10 |
| 9141  | nucleoside triphosphate metabolic process                | 3.43E-10 |
| 9199  | ribonucleoside triphosphate metabolic process            | 3.52E-10 |
| 16071 | mRNA metabolic process                                   | 4.59E-10 |
| 33554 | cellular response to stress                              | 5.01E-10 |
| 9205  | purine ribonucleoside triphosphate metabolic process     | 6.04E-10 |
| 61061 | muscle structure development                             | 6.09E-10 |
| 7155  | cell adhesion                                            | 6.36E-10 |
| 9144  | purine nucleoside triphosphate metabolic process         | 7.20E-10 |
| 48514 | blood vessel morphogenesis                               | 8.81E-10 |
| 30036 | actin cytoskeleton organization                          | 8.91E-10 |
| 60548 | negative regulation of cell death                        | 9.07E-10 |
| 48646 | anatomical structure formation involved in morphogene    | 9.35E-10 |
| 902   | cell morphogenesis                                       | 1.10E-09 |
| 22610 | biological adhesion                                      | 1.30E-09 |
| 6163  | purine nucleotide metabolic process                      | 2.66E-09 |
| 16568 | chromatin modification                                   | 2.82E-09 |
| 18193 | peptidyl-amino acid modification                         | 3.08E-09 |
| 3007  | heart morphogenesis                                      | 3.58E-09 |
| 6508  | proteolysis                                              | 3.64E-09 |
| 40007 | growth                                                   | 4.13E-09 |
| 8285  | negative regulation of cell proliferation                | 4.53E-09 |
| 9261  | ribonucleotide catabolic process                         | 4.61E-09 |
| 43086 | negative regulation of catalytic activity                | 4.63E-09 |
| 45184 | establishment of protein localization                    | 4.80E-09 |
| 9166  | nucleotide catabolic process                             | 5.22E-09 |
| 6195  | purine nucleotide catabolic process                      | 5.95E-09 |
| 43069 | negative regulation of programmed cell death             | 6.10E-09 |
| 72523 | purine-containing compound catabolic process             | 6.48E-09 |
| 34655 | nucleobase, nucleoside, nucleotide and nucleic acid cata | 7.23E-09 |
| 34656 | nucleobase, nucleoside and nucleotide catabolic proces   | 7.23E-09 |
| 72521 | purine-containing compound metabolic process             | 7.59E-09 |
| 6325  | chromatin organization                                   | 1.04E-08 |
| 48729 | tissue morphogenesis                                     | 1.14E-08 |
| 9203  | ribonucleoside triphosphate catabolic process            | 1.17E-08 |
| 31329 | regulation of cellular catabolic process                 | 1.23E-08 |
| 43066 | negative regulation of apoptosis                         | 1.39E-08 |
| 6417  | regulation of translation                                | 1.42E-08 |
| 34621 | cellular macromolecular complex subunit organization     | 1.49E-08 |
| 9154  | purine ribonucleotide catabolic process                  | 1.52E-08 |
| 9143  | nucleoside triphosphate catabolic process                | 1.59E-08 |
| 55010 | ventricular cardiac muscle tissue morphogenesis          | 1.62E-08 |
| 6397  | mRNA processing                                          | 1.66E-08 |
| 44270 | cellular nitrogen compound catabolic process             | 1.66E-08 |

|       |                                                            |          |
|-------|------------------------------------------------------------|----------|
| 9207  | purine ribonucleoside triphosphate catabolic process       | 1.73E-08 |
| 8015  | blood circulation                                          | 1.74E-08 |
| 3013  | circulatory system process                                 | 1.83E-08 |
| 19752 | carboxylic acid metabolic process                          | 1.84E-08 |
| 43436 | oxoacid metabolic process                                  | 1.84E-08 |
| 34622 | cellular macromolecular complex assembly                   | 1.98E-08 |
| 16192 | vesicle-mediated transport                                 | 2.33E-08 |
| 60070 | canonical Wnt receptor signaling pathway                   | 2.54E-08 |
| 46700 | heterocycle catabolic process                              | 2.74E-08 |
| 3229  | ventricular cardiac muscle tissue development              | 2.90E-08 |
| 44092 | negative regulation of molecular function                  | 3.23E-08 |
| 9146  | purine nucleoside triphosphate catabolic process           | 3.28E-08 |
| 51726 | regulation of cell cycle                                   | 3.50E-08 |
| 6082  | organic acid metabolic process                             | 4.46E-08 |
| 30239 | myofibril assembly                                         | 5.06E-08 |
| 43408 | regulation of MAPKKK cascade                               | 5.08E-08 |
| 6084  | acetyl-CoA metabolic process                               | 5.39E-08 |
| 51276 | chromosome organization                                    | 5.50E-08 |
| 22402 | cell cycle process                                         | 6.57E-08 |
| 904   | cell morphogenesis involved in differentiation             | 7.83E-08 |
| 55001 | muscle cell development                                    | 7.93E-08 |
| 44262 | cellular carbohydrate metabolic process                    | 8.05E-08 |
| 31324 | negative regulation of cellular metabolic process          | 9.28E-08 |
| 51603 | proteolysis involved in cellular protein catabolic process | 9.36E-08 |
| 42325 | regulation of phosphorylation                              | 9.40E-08 |
| 42127 | regulation of cell proliferation                           | 1.03E-07 |
| 42180 | cellular ketone metabolic process                          | 1.21E-07 |
| 51248 | negative regulation of protein metabolic process           | 1.29E-07 |
| 51259 | protein oligomerization                                    | 1.40E-07 |
| 165   | MAPKKK cascade                                             | 1.59E-07 |
| 3015  | heart process                                              | 1.63E-07 |
| 60047 | heart contraction                                          | 1.63E-07 |
| 3208  | cardiac ventricle morphogenesis                            | 1.65E-07 |
| 6886  | intracellular protein transport                            | 1.69E-07 |
| 55002 | striated muscle cell development                           | 1.96E-07 |
| 33275 | actin-myosin filament sliding                              | 2.01E-07 |
| 19220 | regulation of phosphate metabolic process                  | 2.16E-07 |
| 51174 | regulation of phosphorus metabolic process                 | 2.16E-07 |
| 44257 | cellular protein catabolic process                         | 2.21E-07 |
| 15031 | protein transport                                          | 2.26E-07 |
| 6928  | cellular component movement                                | 2.30E-07 |
| 51146 | striated muscle cell differentiation                       | 2.72E-07 |
| 9790  | embryo development                                         | 2.80E-07 |
| 44093 | positive regulation of molecular function                  | 2.90E-07 |
| 60429 | epithelium development                                     | 3.18E-07 |
| 16569 | covalent chromatin modification                            | 3.26E-07 |
| 70647 | protein modification by small protein conjugation or ren   | 3.42E-07 |
| 30198 | extracellular matrix organization                          | 3.83E-07 |
| 43062 | extracellular structure organization                       | 3.83E-07 |

|       |                                                           |          |
|-------|-----------------------------------------------------------|----------|
| 31032 | actomyosin structure organization                         | 3.87E-07 |
| 16049 | cell growth                                               | 3.88E-07 |
| 16570 | histone modification                                      | 4.46E-07 |
| 32270 | positive regulation of cellular protein metabolic process | 4.81E-07 |
| 70252 | actin-mediated cell contraction                           | 5.26E-07 |
| 51336 | regulation of hydrolase activity                          | 5.34E-07 |
| 278   | mitotic cell cycle                                        | 6.30E-07 |
| 9887  | organ morphogenesis                                       | 6.72E-07 |
| 45859 | regulation of protein kinase activity                     | 7.26E-07 |
| 30030 | cell projection organization                              | 7.74E-07 |
| 33365 | protein localization to organelle                         | 7.83E-07 |
| 1558  | regulation of cell growth                                 | 8.35E-07 |
| 61024 | membrane organization                                     | 8.38E-07 |
| 6099  | tricarboxylic acid cycle                                  | 8.57E-07 |
| 16044 | cellular membrane organization                            | 1.04E-06 |
| 22008 | neurogenesis                                              | 1.09E-06 |
| 31175 | neuron projection development                             | 1.12E-06 |
| 30111 | regulation of Wnt receptor signaling pathway              | 1.15E-06 |
| 45333 | cellular respiration                                      | 1.19E-06 |
| 30855 | epithelial cell differentiation                           | 1.20E-06 |
| 9060  | aerobic respiration                                       | 1.21E-06 |
| 10648 | negative regulation of cell communication                 | 1.60E-06 |
| 30199 | collagen fibril organization                              | 1.66E-06 |
| 46356 | acetyl-CoA catabolic process                              | 1.71E-06 |
| 3231  | cardiac ventricle development                             | 1.79E-06 |
| 5975  | carbohydrate metabolic process                            | 1.84E-06 |
| 6457  | protein folding                                           | 1.90E-06 |
| 6605  | protein targeting                                         | 1.96E-06 |
| 6066  | alcohol metabolic process                                 | 2.12E-06 |
| 9967  | positive regulation of signal transduction                | 2.19E-06 |
| 43085 | positive regulation of catalytic activity                 | 2.21E-06 |
| 8380  | RNA splicing                                              | 2.28E-06 |
| 60828 | regulation of canonical Wnt receptor signaling pathway    | 2.50E-06 |
| 35295 | tube development                                          | 2.72E-06 |
| 7265  | Ras protein signal transduction                           | 2.75E-06 |
| 3206  | cardiac chamber morphogenesis                             | 2.94E-06 |
| 44087 | regulation of cellular component biogenesis               | 3.18E-06 |
| 7243  | intracellular protein kinase cascade                      | 3.63E-06 |
| 23057 | negative regulation of signaling                          | 3.65E-06 |
| 15985 | energy coupled proton transport, down electrochemical     | 3.74E-06 |
| 15986 | ATP synthesis coupled proton transport                    | 3.74E-06 |
| 1701  | in utero embryonic development                            | 3.77E-06 |
| 32269 | negative regulation of cellular protein metabolic process | 4.06E-06 |
| 48699 | generation of neurons                                     | 4.10E-06 |
| 51346 | negative regulation of hydrolase activity                 | 4.29E-06 |
| 3205  | cardiac chamber development                               | 4.77E-06 |
| 43549 | regulation of kinase activity                             | 4.86E-06 |
| 10627 | regulation of intracellular protein kinase cascade        | 4.87E-06 |
| 51338 | regulation of transferase activity                        | 5.43E-06 |

|         |                                                                               |          |
|---------|-------------------------------------------------------------------------------|----------|
| 30811   | regulation of nucleotide catabolic process                                    | 6.35E-06 |
| 33121   | regulation of purine nucleotide catabolic process                             | 6.35E-06 |
| 51247   | positive regulation of protein metabolic process                              | 6.70E-06 |
| 6413    | translational initiation                                                      | 6.85E-06 |
| 43632   | modification-dependent macromolecule catabolic process                        | 7.11E-06 |
| 45595   | regulation of cell differentiation                                            | 7.22E-06 |
| 48584   | positive regulation of response to stimulus                                   | 7.48E-06 |
| 19941   | modification-dependent protein catabolic process                              | 7.52E-06 |
| 33673   | negative regulation of kinase activity                                        | 8.53E-06 |
| 30182   | neuron differentiation                                                        | 9.94E-06 |
| 6913    | nucleocytoplasmic transport                                                   | 1.00E-05 |
| 48585   | negative regulation of response to stimulus                                   | 1.16E-05 |
| 2000026 | regulation of multicellular organismal development                            | 1.17E-05 |
| 6941    | striated muscle contraction                                                   | 1.27E-05 |
| 22604   | regulation of cell morphogenesis                                              | 1.32E-05 |
| 9968    | negative regulation of signal transduction                                    | 1.32E-05 |
| 40008   | regulation of growth                                                          | 1.33E-05 |
| 51169   | nuclear transport                                                             | 1.41E-05 |
| 44283   | small molecule biosynthetic process                                           | 1.47E-05 |
| 6511    | ubiquitin-dependent protein catabolic process                                 | 1.57E-05 |
| 42692   | muscle cell differentiation                                                   | 1.68E-05 |
| 30048   | actin filament-based movement                                                 | 1.68E-05 |
| 51130   | positive regulation of cellular component organization                        | 1.73E-05 |
| 7266    | Rho protein signal transduction                                               | 1.99E-05 |
| 51260   | protein homooligomerization                                                   | 1.99E-05 |
| 30177   | positive regulation of Wnt receptor signaling pathway                         | 2.09E-05 |
| 7264    | small GTPase mediated signal transduction                                     | 2.12E-05 |
| 32446   | protein modification by small protein conjugation                             | 2.22E-05 |
| 51056   | regulation of small GTPase mediated signal transduction                       | 2.32E-05 |
| 90092   | regulation of transmembrane receptor protein serine/threonine kinase activity | 2.34E-05 |
| 51186   | cofactor metabolic process                                                    | 2.65E-05 |
| 6184    | GTP catabolic process                                                         | 2.76E-05 |
| 22411   | cellular component disassembly                                                | 2.89E-05 |
| 30518   | steroid hormone receptor signaling pathway                                    | 2.89E-05 |
| 71901   | negative regulation of protein serine/threonine kinase activity               | 2.99E-05 |
| 6469    | negative regulation of protein kinase activity                                | 3.21E-05 |
| 23056   | positive regulation of signaling                                              | 3.33E-05 |
| 48666   | neuron development                                                            | 3.44E-05 |
| 51187   | cofactor catabolic process                                                    | 3.67E-05 |
| 22603   | regulation of anatomical structure morphogenesis                              | 3.75E-05 |
| 10629   | negative regulation of gene expression                                        | 3.87E-05 |
| 46039   | GTP metabolic process                                                         | 3.89E-05 |
| 7179    | transforming growth factor beta receptor signaling pathway                    | 3.95E-05 |
| 1525    | angiogenesis                                                                  | 4.55E-05 |
| 43623   | cellular protein complex assembly                                             | 4.78E-05 |
| 46578   | regulation of Ras protein signal transduction                                 | 4.84E-05 |
| 9890    | negative regulation of biosynthetic process                                   | 5.44E-05 |
| 9109    | coenzyme catabolic process                                                    | 5.47E-05 |
| 16055   | Wnt receptor signaling pathway                                                | 5.52E-05 |

|         |                                                           |          |
|---------|-----------------------------------------------------------|----------|
| 10647   | positive regulation of cell communication                 | 5.60E-05 |
| 19318   | hexose metabolic process                                  | 5.87E-05 |
| 2000113 | negative regulation of cellular macromolecule biosynthe   | 5.94E-05 |
| 51129   | negative regulation of cellular component organization    | 5.97E-05 |
| 42592   | homeostatic process                                       | 6.27E-05 |
| 40012   | regulation of locomotion                                  | 6.33E-05 |
| 90263   | positive regulation of canonical Wnt receptor signaling p | 6.52E-05 |
| 51493   | regulation of cytoskeleton organization                   | 7.05E-05 |
| 40011   | locomotion                                                | 7.41E-05 |
| 51348   | negative regulation of transferase activity               | 7.50E-05 |
| 45214   | sarcomere organization                                    | 8.03E-05 |
| 8284    | positive regulation of cell proliferation                 | 8.15E-05 |
| 8016    | regulation of heart contraction                           | 8.17E-05 |
| 31327   | negative regulation of cellular biosynthetic process      | 8.36E-05 |
| 16477   | cell migration                                            | 8.39E-05 |
| 6259    | DNA metabolic process                                     | 8.49E-05 |
| 35023   | regulation of Rho protein signal transduction             | 8.86E-05 |
| 48870   | cell motility                                             | 8.87E-05 |
| 51674   | localization of cell                                      | 8.87E-05 |
| 30049   | muscle filament sliding                                   | 8.88E-05 |
| 71845   | cellular component disassembly at cellular level          | 8.92E-05 |
| 48858   | cell projection morphogenesis                             | 9.50E-05 |
| 6897    | endocytosis                                               | 9.55E-05 |
| 10324   | membrane invagination                                     | 9.55E-05 |
| 31401   | positive regulation of protein modification process       | 9.89E-05 |
| 10927   | cellular component assembly involved in morphogenesis:    | 1.10E-04 |
| 15980   | energy derivation by oxidation of organic compounds       | 1.13E-04 |
| 6172    | ADP biosynthetic process                                  | 1.15E-04 |
| 9136    | purine nucleoside diphosphate biosynthetic process        | 1.15E-04 |
| 9180    | purine ribonucleoside diphosphate biosynthetic process    | 1.15E-04 |
| 6974    | response to DNA damage stimulus                           | 1.20E-04 |
| 16567   | protein ubiquitination                                    | 1.26E-04 |
| 10558   | negative regulation of macromolecule biosynthetic proc    | 1.27E-04 |
| 32386   | regulation of intracellular transport                     | 1.27E-04 |
| 43087   | regulation of GTPase activity                             | 1.30E-04 |
| 32990   | cell part morphogenesis                                   | 1.32E-04 |
| 70887   | cellular response to chemical stimulus                    | 1.40E-04 |
| 71843   | cellular component biogenesis at cellular level           | 1.58E-04 |
| 43009   | chordate embryonic development                            | 1.62E-04 |
| 30334   | regulation of cell migration                              | 1.67E-04 |
| 31668   | cellular response to extracellular stimulus               | 1.68E-04 |
| 48812   | neuron projection morphogenesis                           | 1.71E-04 |
| 42176   | regulation of protein catabolic process                   | 1.79E-04 |
| 51301   | cell division                                             | 1.85E-04 |
| 30522   | intracellular receptor mediated signaling pathway         | 1.86E-04 |
| 6916    | anti-apoptosis                                            | 1.89E-04 |
| 9792    | embryo development ending in birth or egg hatching        | 1.93E-04 |
| 45786   | negative regulation of cell cycle                         | 2.00E-04 |
| 46034   | ATP metabolic process                                     | 2.13E-04 |

|         |                                                                          |          |
|---------|--------------------------------------------------------------------------|----------|
| 44057   | regulation of system process                                             | 2.14E-04 |
| 34330   | cell junction organization                                               | 2.14E-04 |
| 2000145 | regulation of cell motility                                              | 2.17E-04 |
| 33124   | regulation of GTP catabolic process                                      | 2.25E-04 |
| 50684   | regulation of mRNA processing                                            | 2.29E-04 |
| 22613   | ribonucleoprotein complex biogenesis                                     | 2.30E-04 |
| 31328   | positive regulation of cellular biosynthetic process                     | 2.31E-04 |
| 10628   | positive regulation of gene expression                                   | 2.33E-04 |
| 51093   | negative regulation of developmental process                             | 2.33E-04 |
| 43068   | positive regulation of programmed cell death                             | 2.38E-04 |
| 16126   | sterol biosynthetic process                                              | 2.52E-04 |
| 60284   | regulation of cell development                                           | 2.53E-04 |
| 71496   | cellular response to external stimulus                                   | 2.56E-04 |
| 16579   | protein deubiquitination                                                 | 2.57E-04 |
| 5996    | monosaccharide metabolic process                                         | 2.86E-04 |
| 10557   | positive regulation of macromolecule biosynthetic process                | 2.90E-04 |
| 2009    | morphogenesis of an epithelium                                           | 2.92E-04 |
| 51270   | regulation of cellular component movement                                | 2.96E-04 |
| 87      | M phase of mitotic cell cycle                                            | 3.05E-04 |
| 43547   | positive regulation of GTPase activity                                   | 3.34E-04 |
| 9188    | ribonucleoside diphosphate biosynthetic process                          | 3.42E-04 |
| 52547   | regulation of peptidase activity                                         | 3.60E-04 |
| 33043   | regulation of organelle organization                                     | 3.70E-04 |
| 48285   | organelle fission                                                        | 3.79E-04 |
| 51254   | positive regulation of RNA metabolic process                             | 4.22E-04 |
| 6006    | glucose metabolic process                                                | 4.26E-04 |
| 43065   | positive regulation of apoptosis                                         | 4.77E-04 |
| 7050    | cell cycle arrest                                                        | 4.83E-04 |
| 90257   | regulation of muscle system process                                      | 5.05E-04 |
| 30323   | respiratory tube development                                             | 5.37E-04 |
| 10466   | negative regulation of peptidase activity                                | 5.44E-04 |
| 17038   | protein import                                                           | 5.59E-04 |
| 48667   | cell morphogenesis involved in neuron differentiation                    | 6.13E-04 |
| 280     | nuclear division                                                         | 6.15E-04 |
| 7067    | mitosis                                                                  | 6.15E-04 |
| 45596   | negative regulation of cell differentiation                              | 6.26E-04 |
| 7015    | actin filament organization                                              | 6.34E-04 |
| 34329   | cell junction assembly                                                   | 6.52E-04 |
| 43648   | dicarboxylic acid metabolic process                                      | 7.00E-04 |
| 60048   | cardiac muscle contraction                                               | 7.18E-04 |
| 55007   | cardiac muscle cell differentiation                                      | 7.36E-04 |
| 46031   | ADP metabolic process                                                    | 7.94E-04 |
| 55006   | cardiac cell development                                                 | 8.08E-04 |
| 55013   | cardiac muscle cell development                                          | 8.08E-04 |
| 10942   | positive regulation of cell death                                        | 9.01E-04 |
| 71900   | regulation of protein serine/threonine kinase activity                   | 9.08E-04 |
| 90100   | positive regulation of transmembrane receptor protein signaling activity | 9.36E-04 |
| 45893   | positive regulation of transcription, DNA-dependent                      | 9.72E-04 |
| 1503    | ossification                                                             | 9.92E-04 |



|         |                                                             |          |
|---------|-------------------------------------------------------------|----------|
| 48771   | tissue remodeling                                           | 1.13E-03 |
| 51253   | negative regulation of RNA metabolic process                | 1.13E-03 |
| 16571   | histone methylation                                         | 1.18E-03 |
| 17148   | negative regulation of translation                          | 1.26E-03 |
| 19725   | cellular homeostasis                                        | 1.29E-03 |
| 30278   | regulation of ossification                                  | 1.38E-03 |
| 51345   | positive regulation of hydrolase activity                   | 1.42E-03 |
| 30324   | lung development                                            | 1.42E-03 |
| 18209   | peptidyl-serine modification                                | 1.45E-03 |
| 6357    | regulation of transcription from RNA polymerase II promoter | 1.45E-03 |
| 6695    | cholesterol biosynthetic process                            | 1.52E-03 |
| 9133    | nucleoside diphosphate biosynthetic process                 | 1.58E-03 |
| 6754    | ATP biosynthetic process                                    | 1.65E-03 |
| 31344   | regulation of cell projection organization                  | 1.67E-03 |
| 6366    | transcription from RNA polymerase II promoter               | 1.68E-03 |
| 30509   | BMP signaling pathway                                       | 1.84E-03 |
| 7017    | microtubule-based process                                   | 1.98E-03 |
| 18105   | peptidyl-serine phosphorylation                             | 2.04E-03 |
| 15992   | proton transport                                            | 2.06E-03 |
| 6140    | regulation of nucleotide metabolic process                  | 2.14E-03 |
| 35239   | tube morphogenesis                                          | 2.16E-03 |
| 45732   | positive regulation of protein catabolic process            | 2.22E-03 |
| 44275   | cellular carbohydrate catabolic process                     | 2.37E-03 |
| 43154   | negative regulation of caspase activity                     | 2.60E-03 |
| 1570    | vasculogenesis                                              | 2.60E-03 |
| 30335   | positive regulation of cell migration                       | 2.74E-03 |
| 9135    | purine nucleoside diphosphate metabolic process             | 2.82E-03 |
| 9179    | purine ribonucleoside diphosphate metabolic process         | 2.82E-03 |
| 2027    | regulation of heart rate                                    | 2.95E-03 |
| 6818    | hydrogen transport                                          | 2.96E-03 |
| 31346   | positive regulation of cell projection organization         | 3.03E-03 |
| 51173   | positive regulation of nitrogen compound metabolic process  | 3.08E-03 |
| 46777   | protein autophosphorylation                                 | 3.12E-03 |
| 51592   | response to calcium ion                                     | 3.17E-03 |
| 45934   | negative regulation of nucleobase, nucleoside, nucleotide   | 3.20E-03 |
| 45892   | negative regulation of transcription, DNA-dependent         | 3.30E-03 |
| 45935   | positive regulation of nucleobase, nucleoside, nucleotide   | 3.37E-03 |
| 31589   | cell-substrate adhesion                                     | 3.44E-03 |
| 2000147 | positive regulation of cell motility                        | 3.49E-03 |
| 61077   | chaperone-mediated protein folding                          | 3.52E-03 |
| 72594   | establishment of protein localization to organelle          | 3.66E-03 |
| 70723   | response to cholesterol                                     | 3.74E-03 |
| 43462   | regulation of ATPase activity                               | 3.88E-03 |
| 10033   | response to organic substance                               | 3.99E-03 |
| 51172   | negative regulation of nitrogen compound metabolic process  | 4.03E-03 |
| 40017   | positive regulation of locomotion                           | 4.04E-03 |
| 8217    | regulation of blood pressure                                | 4.09E-03 |
| 1822    | kidney development                                          | 4.10E-03 |
| 43254   | regulation of protein complex assembly                      | 4.14E-03 |

|       |                                                                          |          |
|-------|--------------------------------------------------------------------------|----------|
| 9206  | purine ribonucleoside triphosphate biosynthetic process                  | 4.19E-03 |
| 9152  | purine ribonucleotide biosynthetic process                               | 4.20E-03 |
| 31669 | cellular response to nutrient levels                                     | 4.30E-03 |
| 22403 | cell cycle phase                                                         | 4.30E-03 |
| 10975 | regulation of neuron projection development                              | 4.33E-03 |
| 55003 | cardiac myofibril assembly                                               | 4.44E-03 |
| 32388 | positive regulation of intracellular transport                           | 4.51E-03 |
| 34968 | histone lysine methylation                                               | 4.52E-03 |
| 9145  | purine nucleoside triphosphate biosynthetic process                      | 4.67E-03 |
| 72001 | renal system development                                                 | 4.68E-03 |
| 34504 | protein localization to nucleus                                          | 4.80E-03 |
| 48193 | Golgi vesicle transport                                                  | 4.81E-03 |
| 48878 | chemical homeostasis                                                     | 4.89E-03 |
| 43409 | negative regulation of MAPKKK cascade                                    | 4.97E-03 |
| 16337 | cell-cell adhesion                                                       | 5.03E-03 |
| 70646 | protein modification by small protein removal                            | 5.08E-03 |
| 6629  | lipid metabolic process                                                  | 5.15E-03 |
| 10740 | positive regulation of intracellular protein kinase cascades             | 5.18E-03 |
| 9201  | ribonucleoside triphosphate biosynthetic process                         | 5.19E-03 |
| 9260  | ribonucleotide biosynthetic process                                      | 5.19E-03 |
| 35051 | cardiac cell differentiation                                             | 5.28E-03 |
| 17015 | regulation of transforming growth factor beta receptor signaling pathway | 5.32E-03 |
| 55085 | transmembrane transport                                                  | 5.58E-03 |
| 30155 | regulation of cell adhesion                                              | 5.61E-03 |
| 45664 | regulation of neuron differentiation                                     | 5.75E-03 |
| 3     | reproduction                                                             | 5.81E-03 |
| 72593 | reactive oxygen species metabolic process                                | 6.35E-03 |
| 1655  | urogenital system development                                            | 6.56E-03 |
| 32787 | monocarboxylic acid metabolic process                                    | 6.72E-03 |
| 60541 | respiratory system development                                           | 6.83E-03 |
| 9142  | nucleoside triphosphate biosynthetic process                             | 7.05E-03 |
| 22414 | reproductive process                                                     | 7.11E-03 |
| 90066 | regulation of anatomical structure size                                  | 7.23E-03 |
| 6732  | coenzyme metabolic process                                               | 7.47E-03 |
| 7512  | adult heart development                                                  | 7.48E-03 |
| 6979  | response to oxidative stress                                             | 7.74E-03 |
| 32970 | regulation of actin filament-based process                               | 7.90E-03 |
| 51094 | positive regulation of developmental process                             | 8.25E-03 |
| 7163  | establishment or maintenance of cell polarity                            | 8.28E-03 |
| 43281 | regulation of caspase activity                                           | 8.45E-03 |
| 51272 | positive regulation of cellular component movement                       | 8.65E-03 |
| 6937  | regulation of muscle contraction                                         | 8.94E-03 |
| 14896 | muscle hypertrophy                                                       | 9.40E-03 |
| 9896  | positive regulation of catabolic process                                 | 9.50E-03 |
| 7160  | cell-matrix adhesion                                                     | 9.51E-03 |

### Cellular Component GO Terms Modulated by Stretch

| GO ID | Cellular Component                 | Bonferroni p-value |
|-------|------------------------------------|--------------------|
| 44449 | contractile fiber part             | 2.72E-25           |
| 30016 | myofibril                          | 3.75E-25           |
| 43292 | contractile fiber                  | 4.37E-25           |
| 30017 | sarcomere                          | 3.94E-24           |
| 31967 | organelle envelope                 | 2.06E-19           |
| 31975 | envelope                           | 2.39E-19           |
| 31012 | extracellular matrix               | 3.74E-19           |
| 44421 | extracellular region part          | 5.44E-19           |
| 31674 | I band                             | 7.02E-19           |
| 44430 | cytoskeletal part                  | 1.21E-18           |
| 5829  | cytosol                            | 1.05E-16           |
| 5740  | mitochondrial envelope             | 3.35E-16           |
| 31966 | mitochondrial membrane             | 7.31E-16           |
| 5578  | proteinaceous extracellular matrix | 2.00E-15           |
| 30529 | ribonucleoprotein complex          | 2.34E-15           |
| 44429 | mitochondrial part                 | 3.36E-15           |
| 30018 | Z disc                             | 9.23E-15           |
| 15630 | microtubule cytoskeleton           | 2.44E-14           |
| 15629 | actin cytoskeleton                 | 2.36E-13           |
| 5794  | Golgi apparatus                    | 2.57E-13           |
| 19866 | organelle inner membrane           | 2.58E-13           |
| 5743  | mitochondrial inner membrane       | 3.60E-13           |
| 44455 | mitochondrial membrane part        | 2.37E-12           |
| 44420 | extracellular matrix part          | 7.48E-12           |
| 5615  | extracellular space                | 1.01E-11           |
| 70469 | respiratory chain                  | 1.08E-11           |
| 5625  | soluble fraction                   | 6.76E-11           |
| 5746  | mitochondrial respiratory chain    | 5.09E-10           |
| 5581  | collagen                           | 1.15E-09           |
| 5840  | ribosome                           | 2.28E-09           |
| 5626  | insoluble fraction                 | 2.33E-09           |
| 22626 | cytosolic ribosome                 | 3.48E-09           |
| 12505 | endomembrane system                | 5.00E-09           |
| 5783  | endoplasmic reticulum              | 1.25E-08           |
| 5624  | membrane fraction                  | 2.01E-08           |
| 9986  | cell surface                       | 4.63E-08           |
| 5874  | microtubule                        | 5.85E-08           |
| 42598 | vesicular fraction                 | 1.57E-07           |
| 30054 | cell junction                      | 2.13E-07           |
| 70161 | anchoring junction                 | 3.69E-07           |

|                                                |          |
|------------------------------------------------|----------|
| 16323 basolateral plasma membrane              | 3.70E-07 |
| 16459 myosin complex                           | 4.02E-07 |
| 42641 actomyosin                               | 4.68E-07 |
| 5912 adherens junction                         | 8.30E-07 |
| 44445 cytosolic part                           | 1.07E-06 |
| 5813 centrosome                                | 1.25E-06 |
| 45259 proton-transporting ATP synthase comple  | 1.25E-06 |
| 30135 coated vesicle                           | 1.43E-06 |
| 5747 mitochondrial respiratory chain complex   | 1.43E-06 |
| 30964 NADH dehydrogenase complex               | 1.43E-06 |
| 45271 respiratory chain complex I              | 1.43E-06 |
| 16460 myosin II complex                        | 2.23E-06 |
| 5792 microsome                                 | 2.25E-06 |
| 5730 nucleolus                                 | 2.40E-06 |
| 5911 cell-cell junction                        | 2.62E-06 |
| 5604 basement membrane                         | 2.69E-06 |
| 5815 microtubule organizing center             | 4.25E-06 |
| 22627 cytosolic small ribosomal subunit        | 4.51E-06 |
| 5865 striated muscle thin filament             | 6.97E-06 |
| 32432 actin filament bundle                    | 8.25E-06 |
| 5768 endosome                                  | 1.13E-05 |
| 31672 A band                                   | 1.20E-05 |
| 275 mitochondrial proton-transporting ATP sy   | 1.46E-05 |
| 45261 proton-transporting ATP synthase comple  | 1.46E-05 |
| 5924 cell-substrate adherens junction          | 1.59E-05 |
| 44431 Golgi apparatus part                     | 1.85E-05 |
| 48471 perinuclear region of cytoplasm          | 1.88E-05 |
| 31252 cell leading edge                        | 1.90E-05 |
| 5681 spliceosomal complex                      | 2.06E-05 |
| 45177 apical part of cell                      | 2.31E-05 |
| 5753 mitochondrial proton-transporting ATP sy  | 2.71E-05 |
| 1725 stress fiber                              | 2.86E-05 |
| 5654 nucleoplasm                               | 3.11E-05 |
| 19717 synaptosome                              | 3.54E-05 |
| 30055 cell-substrate junction                  | 3.86E-05 |
| 5798 Golgi-associated vesicle                  | 5.68E-05 |
| 31982 vesicle                                  | 8.14E-05 |
| 15935 small ribosomal subunit                  | 1.19E-04 |
| 14704 intercalated disc                        | 1.44E-04 |
| 70603 SWI/SNF-type complex                     | 1.74E-04 |
| 16469 proton-transporting two-sector ATPase cc | 2.24E-04 |
| 30136 clathrin-coated vesicle                  | 2.81E-04 |

|                                               |          |
|-----------------------------------------------|----------|
| 5859 muscle myosin complex                    | 2.88E-04 |
| 16324 apical plasma membrane                  | 3.27E-04 |
| 5925 focal adhesion                           | 3.69E-04 |
| 44291 cell-cell contact zone                  | 4.13E-04 |
| 31410 cytoplasmic vesicle                     | 5.03E-04 |
| 16604 nuclear body                            | 5.65E-04 |
| 43005 neuron projection                       | 6.79E-04 |
| 30117 membrane coat                           | 7.08E-04 |
| 48475 coated membrane                         | 7.08E-04 |
| 31988 membrane-bounded vesicle                | 7.22E-04 |
| 71013 catalytic step 2 spliceosome            | 9.27E-04 |
| 30660 Golgi-associated vesicle membrane       | 9.63E-04 |
| 1726 ruffle                                   | 1.08E-03 |
| 5819 spindle                                  | 1.19E-03 |
| 34708 methyltransferase complex               | 1.54E-03 |
| 35097 histone methyltransferase complex       | 1.54E-03 |
| 30126 COPI vesicle coat                       | 1.67E-03 |
| 30496 midbody                                 | 1.91E-03 |
| 44451 nucleoplasm part                        | 1.94E-03 |
| 31430 M band                                  | 2.26E-03 |
| 502 proteasome complex                        | 2.32E-03 |
| 30027 lamellipodium                           | 2.73E-03 |
| 33178 proton-transporting two-sector ATPase c | 2.76E-03 |
| 16023 cytoplasmic membrane-bounded vesicle    | 3.51E-03 |
| 45121 membrane raft                           | 3.57E-03 |
| 5876 spindle microtubule                      | 3.90E-03 |
| 5750 mitochondrial respiratory chain complex  | 3.92E-03 |
| 45275 respiratory chain complex III           | 3.92E-03 |
| 44432 endoplasmic reticulum part              | 4.24E-03 |
| 16585 chromatin remodeling complex            | 4.41E-03 |
| 5916 fascia adherens                          | 6.08E-03 |
| 30663 COPI coated vesicle membrane            | 8.06E-03 |

### Molecular Function GO Terms Modulated by Stretch

| GO ID | Molecular Function                     | Bonferroni p-value |
|-------|----------------------------------------|--------------------|
| 3723  | RNA binding                            | 9.78E-19           |
| 5198  | structural molecule activity           | 2.87E-17           |
| 16772 | transferase activity, transferring pho | 6.69E-13           |
| 19899 | enzyme binding                         | 8.22E-13           |
| 5102  | receptor binding                       | 9.53E-13           |
| 16301 | kinase activity                        | 5.04E-12           |
| 16773 | phosphotransferase activity, alcohol   | 6.31E-11           |
| 8092  | cytoskeletal protein binding           | 1.27E-10           |
| 48037 | cofactor binding                       | 3.12E-10           |
| 16491 | oxidoreductase activity                | 3.65E-10           |
| 3779  | actin binding                          | 5.59E-10           |
| 4672  | protein kinase activity                | 1.95E-09           |
| 17111 | nucleoside-triphosphatase activity     | 9.08E-09           |
| 19904 | protein domain specific binding        | 1.07E-08           |
| 32403 | protein complex binding                | 4.13E-08           |
| 16462 | pyrophosphatase activity               | 4.14E-08           |
| 16818 | hydrolase activity, acting on acid an  | 7.16E-08           |
| 16817 | hydrolase activity, acting on acid an  | 8.58E-08           |
| 3735  | structural constituent of ribosome     | 2.08E-07           |
| 8047  | enzyme activator activity              | 2.11E-07           |
| 15078 | hydrogen ion transmembrane transp      | 3.24E-07           |
| 30234 | enzyme regulator activity              | 5.07E-07           |
| 50662 | coenzyme binding                       | 5.54E-07           |
| 4674  | protein serine/threonine kinase acti   | 8.89E-07           |
| 16874 | ligase activity                        | 1.01E-06           |
| 5509  | calcium ion binding                    | 1.43E-06           |
| 46983 | protein dimerization activity          | 1.50E-06           |
| 60589 | nucleoside-triphosphatase regulator    | 1.89E-06           |
| 42802 | identical protein binding              | 2.14E-06           |
| 19900 | kinase binding                         | 2.15E-06           |
| 5178  | integrin binding                       | 4.95E-06           |
| 42803 | protein homodimerization activity      | 8.19E-06           |
| 30695 | GTPase regulator activity              | 1.04E-05           |
| 5083  | small GTPase regulator activity        | 1.85E-05           |
| 30246 | carbohydrate binding                   | 2.76E-05           |
| 3712  | transcription cofactor activity        | 4.51E-05           |
| 19901 | protein kinase binding                 | 5.49E-05           |
| 989   | transcription factor binding transcrip | 6.45E-05           |
| 3682  | chromatin binding                      | 7.15E-05           |
| 5200  | structural constituent of cytoskeleto  | 7.21E-05           |

|       |                                          |          |
|-------|------------------------------------------|----------|
| 51082 | unfolded protein binding                 | 7.29E-05 |
| 51287 | NAD binding                              | 7.29E-05 |
| 988   | protein binding transcription factor     | 9.52E-05 |
| 16879 | ligase activity, forming carbon-nitrog   | 1.63E-04 |
| 3729  | mRNA binding                             | 1.99E-04 |
| 5201  | extracellular matrix structural consti   | 2.10E-04 |
| 8135  | translation factor activity, nucleic aci | 2.16E-04 |
| 5096  | GTPase activator activity                | 2.23E-04 |
| 3713  | transcription coactivator activity       | 2.44E-04 |
| 3743  | translation initiation factor activity   | 2.83E-04 |
| 287   | magnesium ion binding                    | 2.98E-04 |
| 5080  | protein kinase C binding                 | 3.27E-04 |
| 51427 | hormone receptor binding                 | 4.14E-04 |
| 5518  | collagen binding                         | 4.49E-04 |
| 1968  | fibronectin binding                      | 4.52E-04 |
| 16887 | ATPase activity                          | 7.65E-04 |
| 16881 | acid-amino acid ligase activity          | 1.24E-03 |
| 19787 | small conjugating protein ligase activ   | 1.28E-03 |
| 4386  | helicase activity                        | 1.31E-03 |
| 42054 | histone methyltransferase activity       | 1.46E-03 |
| 8022  | protein C-terminus binding               | 1.76E-03 |
| 46933 | hydrogen ion transporting ATP synth      | 1.91E-03 |
| 50840 | extracellular matrix binding             | 1.97E-03 |
| 4221  | ubiquitin thiolesterase activity         | 2.07E-03 |
| 31995 | insulin-like growth factor II binding    | 2.09E-03 |
| 4857  | enzyme inhibitor activity                | 2.64E-03 |
| 31072 | heat shock protein binding               | 2.74E-03 |
| 5089  | Rho guanyl-nucleotide exchange fac       | 2.82E-03 |
| 46961 | proton-transporting ATPase activity,     | 2.85E-03 |
| 18024 | histone-lysine N-methyltransferase a     | 3.22E-03 |
| 5520  | insulin-like growth factor binding       | 3.72E-03 |
| 19838 | growth factor binding                    | 4.23E-03 |
| 35257 | nuclear hormone receptor binding         | 4.25E-03 |
| 8307  | structural constituent of muscle         | 4.76E-03 |
| 51015 | actin filament binding                   | 5.21E-03 |
| 42623 | ATPase activity, coupled                 | 5.43E-03 |
| 4842  | ubiquitin-protein ligase activity        | 5.86E-03 |
| 3954  | NADH dehydrogenase activity              | 6.25E-03 |
| 30165 | PDZ domain binding                       | 6.81E-03 |
| 70064 | proline-rich region binding              | 7.31E-03 |
| 5506  | iron ion binding                         | 7.38E-03 |
| 4129  | cytochrome-c oxidase activity            | 7.44E-03 |

|       |                                        |          |
|-------|----------------------------------------|----------|
| 15002 | heme-copper terminal oxidase activi    | 7.44E-03 |
| 16676 | oxidoreductase activity, acting on a l | 7.44E-03 |
| 16790 | thiolester hydrolase activity          | 8.31E-03 |
| 16278 | lysine N-methyltransferase activity    | 8.38E-03 |
| 16279 | protein-lysine N-methyltransferase a   | 8.38E-03 |
| 5516  | calmodulin binding                     | 9.03E-03 |
| 4402  | histone acetyltransferase activity     | 9.18E-03 |
| 4468  | lysine N-acetyltransferase activity    | 9.18E-03 |
